# Supplementary material for: Towards a scientific interpretation of the terroir concept: plasticity of the grape berry metabolome
Source: PubMed Central journal article supplement (PMC4527360; doi:10.1186/s12870-015-0584-4), 2015-08-07
Supplement: 12870_2015_584_MOESM15_ESM.pdf [file 12870_2015_584_MOESM15_ESM.pdf]

# Additional file 15 - O2PLS-DA loading plots, HPLC-MS-detected metabolites

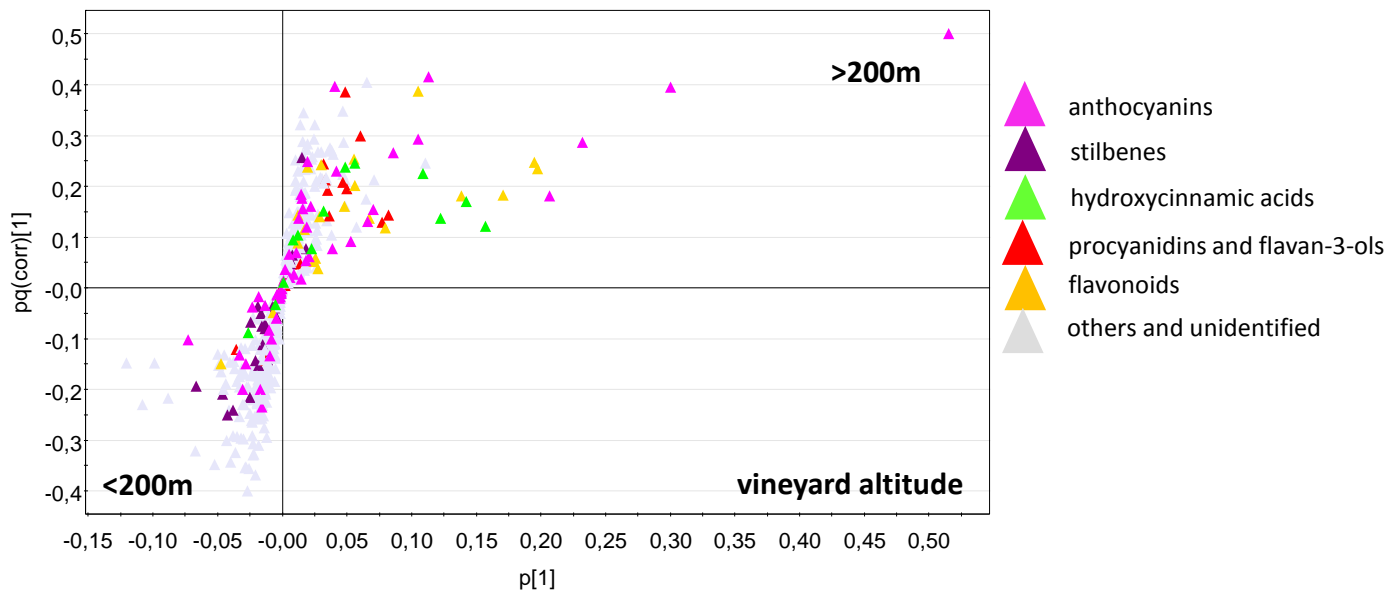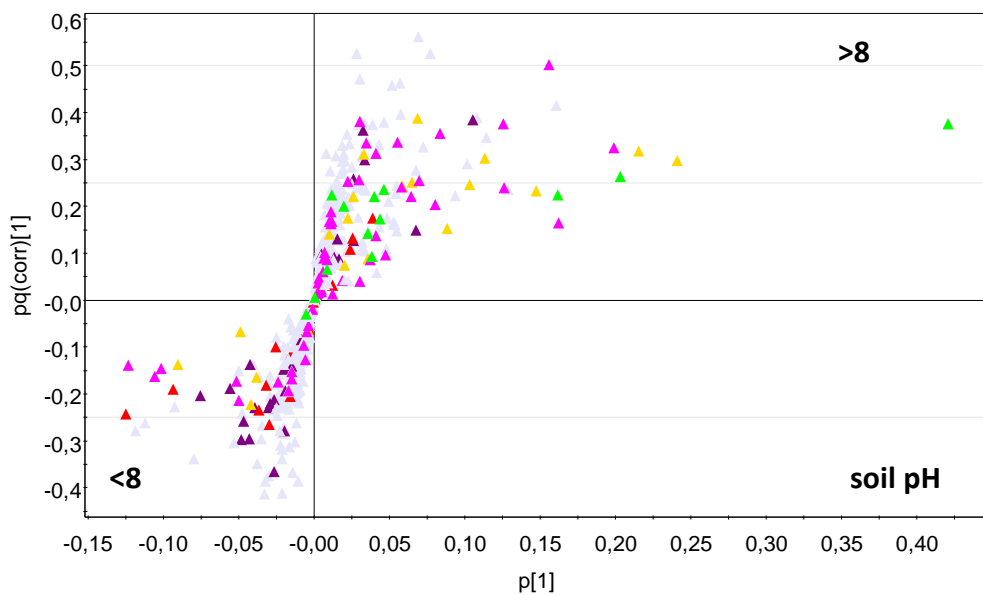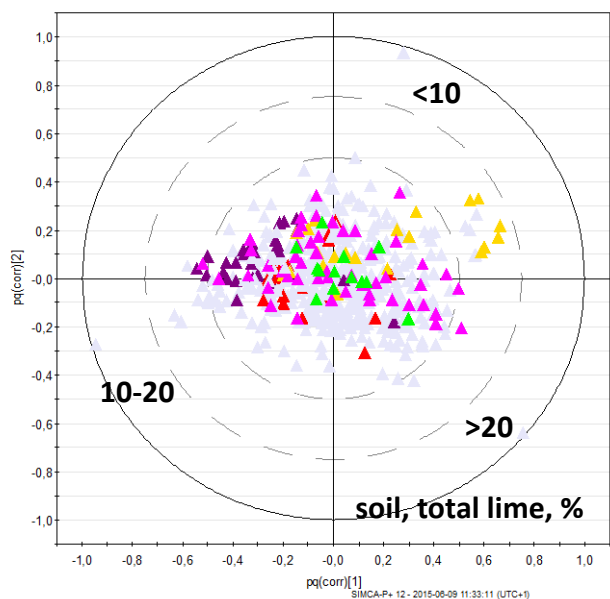

# O2PLS-DA loading plots, HPLC-MS-detected metabolites

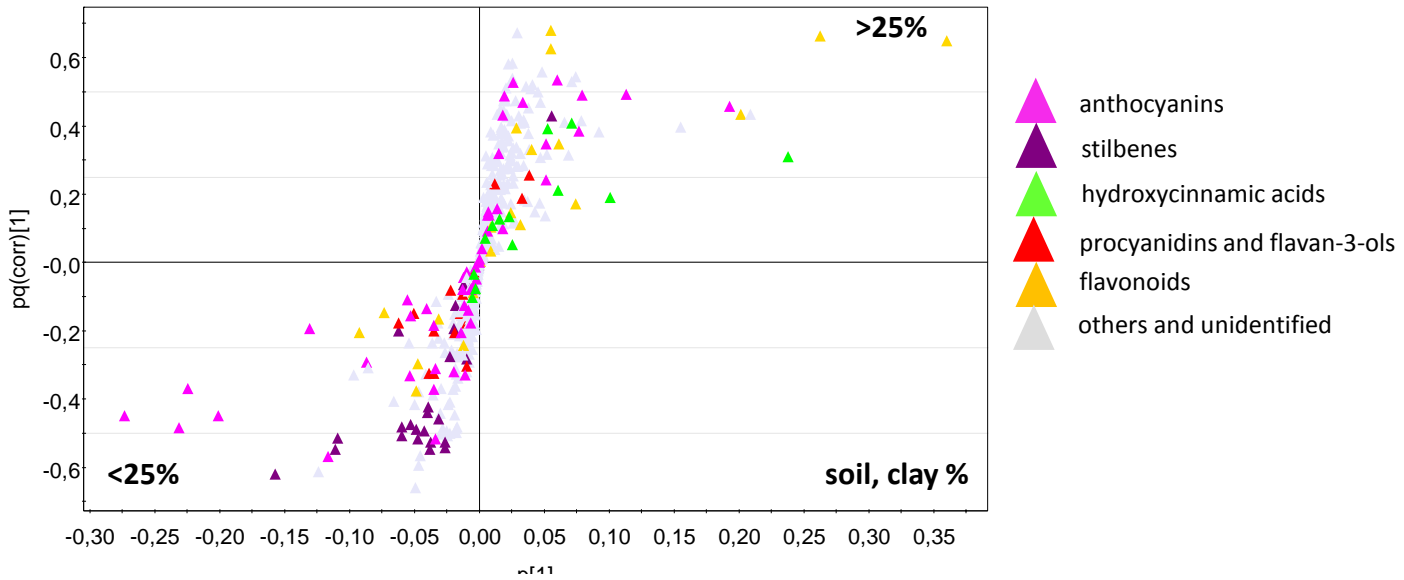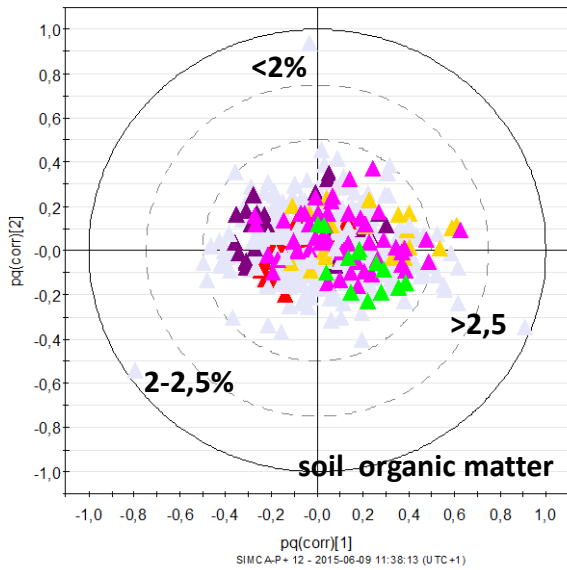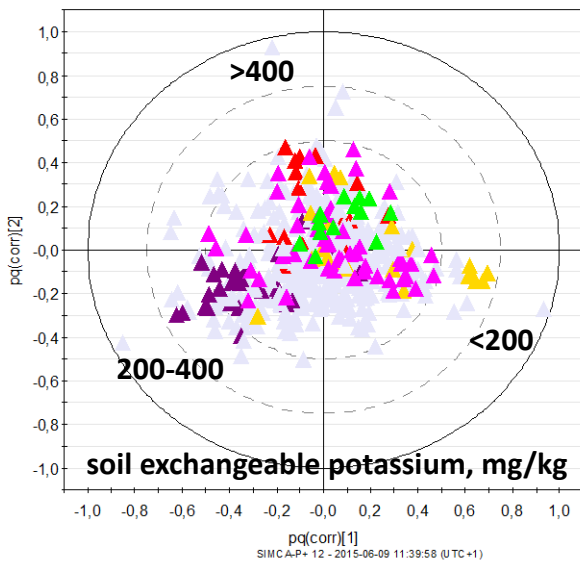

# O2PLS-DA loading plots. GC-MS-detected metabolites

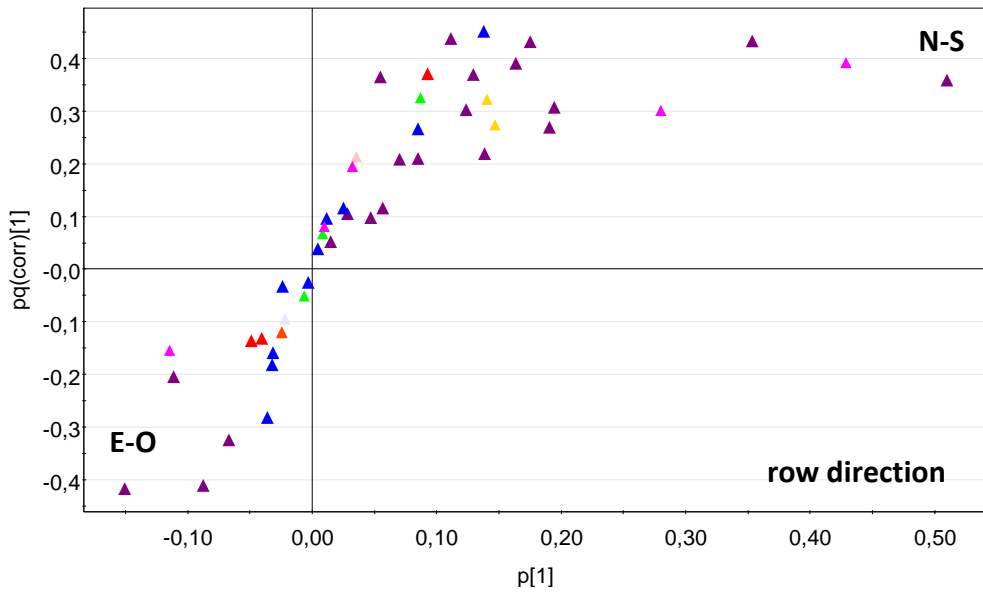

- ▲ sesquiterpenes and sesquiterpenoids
- ▲ monoterpenes
- ▲ benzene derivatives
- ▲ C6 alcohols
- ▲ carboxylic acids
- ▲ C13 norisoprenoids
- ▲ aldehydes and C6 aldehydes
- ▲ others

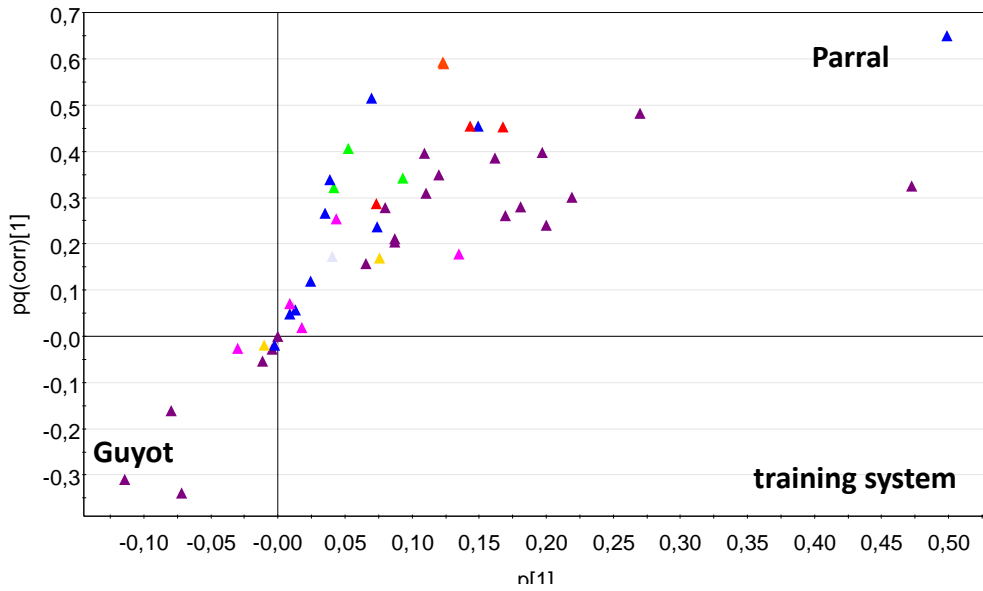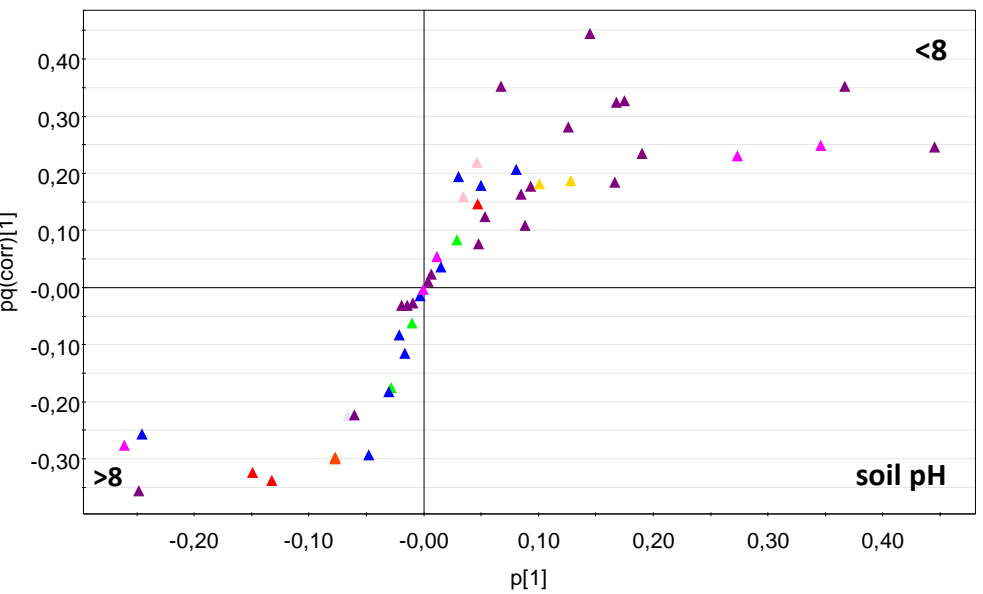

# O2PLS-DA loading plots, GC-MS-detected metabolites

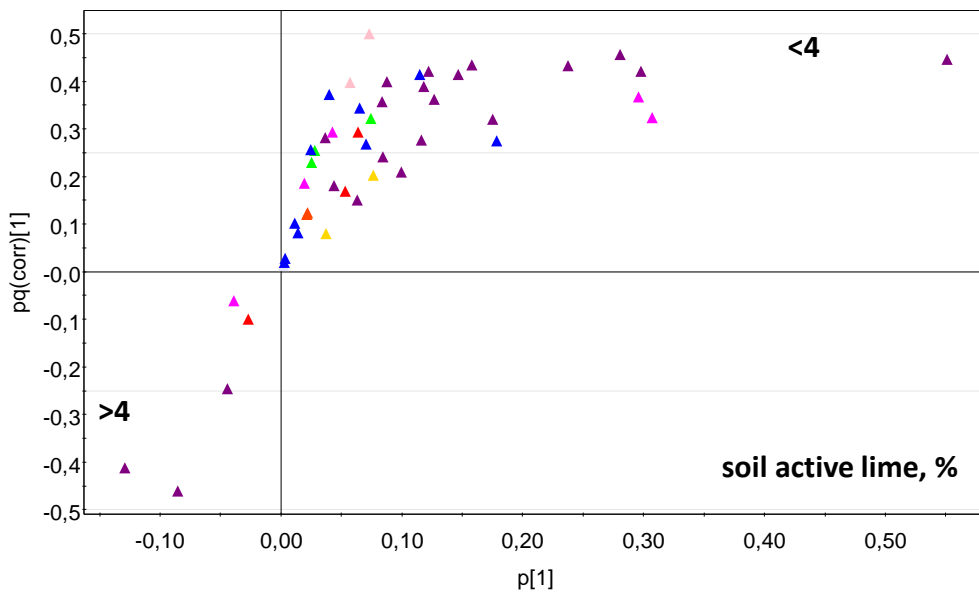

SMCA-P4-12 - 2014-07-22 16:02:50 (UTC+1)

- ▲ sesquiterpenes and sesquiterpenoids
- ▲ monoterpenes
- ▲ benzene derivatives
- ▲ C6 alcohols
- ▲ carboxylic acids
- ▲ C13 norisoprenoids
- ▲ aldehydes and C6 aldehydes
- ▲ others
